# Supplementary material for: Meaning of patient global assessment when joint counts are low in rheumatoid arthritis
Source: HighWire-hosted journal article supplement (doi:10.1136/rmdopen-2022-002346), 2022-06-01
Supplement: rmdopen-2022-002346supp001_data_supplement.pdf [file rmdopen-2022-002346supp001_data_supplement.pdf]

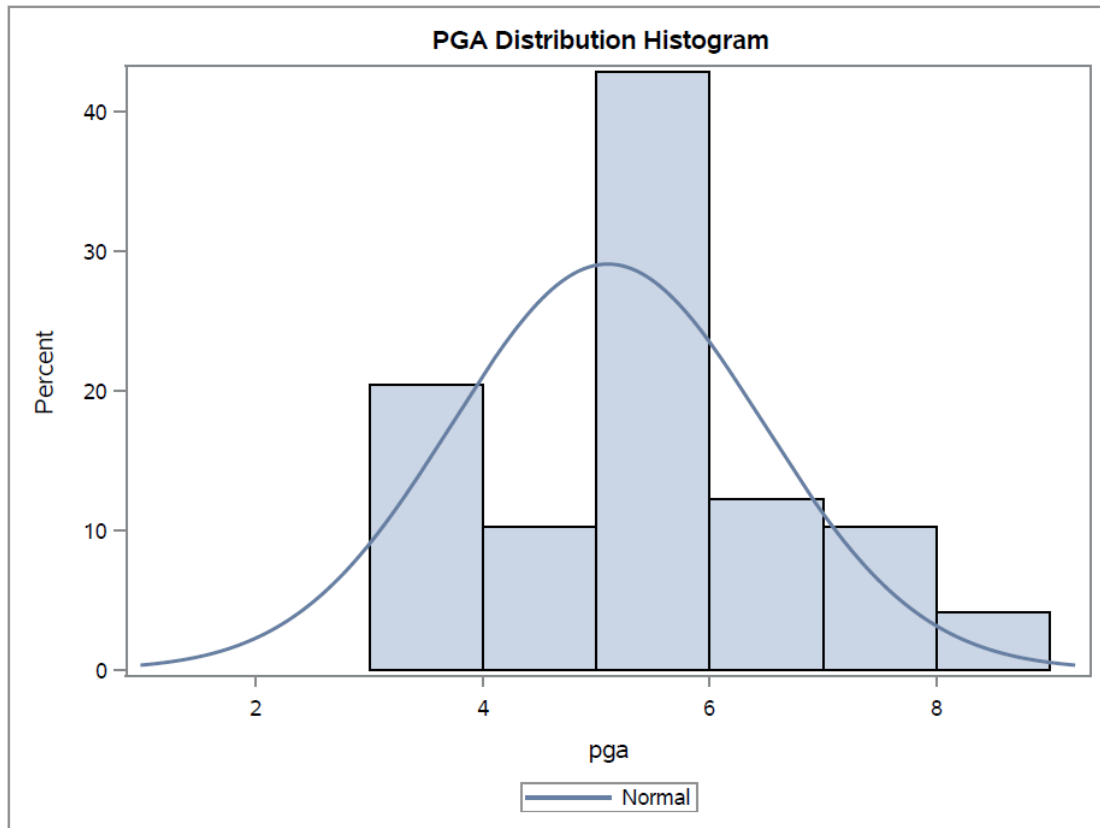

Supplemental Figure 1. Histogram of PGA values in the 49 patients with elevated PGA and low joint counts.

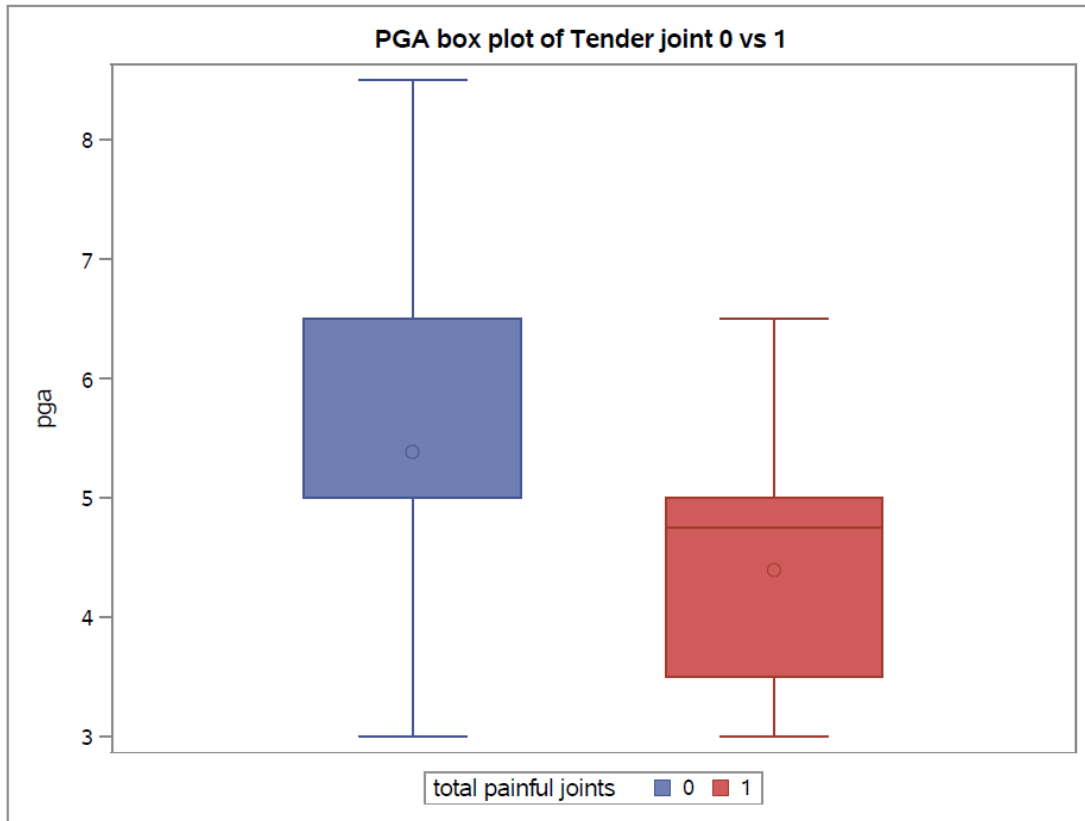

**Supplemental Figure 2.** In the 49 patients with PGA elevation in those with tender joint counts of 0 or 1.
